# Supplementary material for: Animal burrow presence patterns and local shrub density in Central California Deserts
Source: Research Square preprint supplement (doi:10.21203/rs.3.rs-3853990/v1), 2024-01-18
Supplement: Supplementary file 1 [file 1319e85e7b78a27eae0e7e6c.docx]

**Supplementary Tables:**

**Table S1:** Emmeans contrasts on the mean shrub density within a 5-meter radius around observed burrows and pseudoabsences. All contrasts were generated as a pairwise function with site set as a factor. Burrow presence and absences were contrasted against each other at all tested sites. Significant p-values are indicated in bold.

| **Site** | **Contrast** | **Estimate** | **SE** | **z-ratio** | **p-value** |
| --- | --- | --- | --- | --- | --- |
| Barstow_1 | Presence-Absence | 0.28418 | 0 | Inf | **< 0.001** |
| Carrizo_1 | Presence-Absence | 1.24152 | No Contrast |  | No Contract |
| Carrizo_2 | Presence-Absence | -0.77637 | 0 | Inf | **< 0.001** |
| Carrizo_3 | Presence-Absence | -1.69192 | No Contrast |  | No Contrast |
| Carrizo_4 | Presence-Absence | 0.81836 | 0 | Inf | **< 0.0012** |
| Carrizo_6 | Presence-Absence | 0.43799 | 32768 | 0 | 1.00 |
| Carrizo_Soda_Open | Presence-Absence | -24.81982 | 65536 | 0 | 0.9997 |
| Carrizo_Soda_Shrub | Presence-Absence | -26.90576 | 80265 | 0 | 0.9997 |
| Cuyama_1 | Presence-Absence | -0.20605 | 32769 | 0 | 1.00 |
| Cuyama_2 | Presence-Absence | 0.61133 | 0 | Inf | **< 0.001** |
| Cuyama_3 | Presence-Absence | 1.24676 | 0 | Inf | **< 0.001** |
| Cuyama_5 | Presence-Absence | 0.19336 | No Contrast |  | No Contrast |
| Cuyama_6 | Presence-Absence | 0.94824 | 0 | Inf | **< 0.001** |
| Heartofmojave | Presence-Absence | 0.00732 | 0 | Inf | **< 0.001** |
| Kelso_1 | Presence-Absence | -28.68848 | 118147 | 0 | 0.9998 |
| Kelso_2 | Presence-Absence | -0.01807 | 32768 | 0 | 1.00 |
| Kelso_3 | Presence-Absence | 0.15430 | 0 | Inf | **< 0.001** |
| Kelso_4 | Presence-Absence | 0.00244 | No Contrast |  | No Contrast |
| Kelso_5 | Presence-Absence | -28.46094 | 92682 | 0 | 0.9998 |
| Mojave_1 | Presence-Absence | -0.06787 | No Contrast |  | No Contrast |
| Mojave_2 | Presence-Absence | 0.50488 | No Contrast |  | No Contrast |
| Mojave_3 | Presence-Absence | -0.48340 | 32768 | 0 | 1.00 |
| Mojave_4 | Presence-Absence | 0.43066 | 0 | Inf | **< 0.001** |
| Mojave_5 | Presence-Absence | -0.68603 | 0 | Inf | **< 0.001** |
| Sheephole | Presence-Absence | -0.10791 | 0 | Inf | **< 0.001** |
| Sunset_1 | Presence-Absence | 0.01465 | 183444 | 0 | 1.00 |
| Sunset_2 | Presence-Absence | 0.01074 | 201996 | 0 | 1.00 |
| Tecopa | Presence-Absence | -29.37842 | 98304 | 0 | 0.9998 |
| Tecopa_Open | Presence-Absence | 0.00488 | 481589 | 0 | 1.00 |
| Yucca_Grove | Presence-Absence | -0.01074 | 142832 | 0 | 1.00 |
